# Supplementary material for: Ultrasound-responsive doxorubicin microbubbles engineered by QbD: enhanced in vitro anti-breast-cancer efficacy with attenuated cardiac cell toxicity
Source: Research Square preprint supplement (doi:10.21203/rs.3.rs-8565614/v1), 2026-01-16
Supplement: Supplementary file 1 [file 75967738b4d5a6c0b55c9bec.docx]

Supplementary data

**Table S1:** Analysis of Variance (ANOVA) for Quadratic Models Describing Critical Quality Attributes.

| **Source** | **DF** | **Sum of squares** | **Mean square** | **F-value** | **p-value** |
| --- | --- | --- | --- | --- | --- |
| **(A) Mean microbubble size (µm)** | | | | | |
| Model | 9 | 8.42 | 0.935 | 80.6 | < 0.0001 |
| Linear terms | 3 | 6.12 | 2.04 | 176.1 | < 0.0001 |
| Interaction terms | 3 | 0.98 | 0.33 | 28.5 | 0.0012 |
| Quadratic terms | 3 | 1.32 | 0.44 | 37.9 | 0.0006 |
| Residual error | 5 | 0.058 | 0.0116 | — | — |
| Lack of fit | 3 | 0.049 | 0.016 | 3.4 | 0.062 |
| Pure error | 2 | 0.009 | 0.0045 | — | — |
| Total | 14 | 8.48 | — | — | — |
| **(B) Encapsulation efficiency (%)** | | | | | |
| Model | 9 | 642.5 | 71.4 | 91.3 | < 0.0001 |
| Linear terms | 3 | 442.8 | 147.6 | 188.8 | < 0.0001 |
| Interaction terms | 3 | 92.4 | 30.8 | 39.4 | 0.0005 |
| Quadratic terms | 3 | 107.3 | 35.8 | 45.8 | 0.0003 |
| Residual error | 5 | 3.9 | 0.78 | — | — |
| Lack of fit | 3 | 2.7 | 0.9 | 1.1 | 0.434 |
| Pure error | 2 | 1.2 | 0.6 | — | — |
| Total | 14 | 646.4 | — | — | — |
| **(C) Ultrasound-triggered burst in 40 s (%)** | | | | | |
| Model | 9 | 2120.3 | 235.6 | 82.9 | < 0.0001 |
| Linear terms | 3 | 1486.2 | 495.4 | 174.3 | < 0.0001 |
| Interaction terms | 3 | 318.5 | 106.2 | 37.4 | 0.0007 |
| Quadratic terms | 3 | 315.6 | 105.2 | 36.9 | 0.0008 |
| Residual error | 5 | 14.2 | 2.84 | — | — |
| Lack of fit | 3 | 9.8 | 3.27 | 1.6 | 0.328 |
| Pure error | 2 | 4.4 | 2.2 | — | — |
| Total | 14 | 2134.5 | — | — | — |
